# Supplementary material for: Application of Self-Assembly Nanoparticles Based on DVDMS for Fenton-Like Ion Delivery and Enhanced Sonodynamic Therapy
Source: MDPI journal article supplement (doi:10.3390/bios12040255), 2022-04-18
Supplement: s1 [file s1]

# Application of Self-Assembly Nanoparticles Based on DVDMS for Fenton-Like Ion Delivery and Enhanced Sonodynamic Therapy

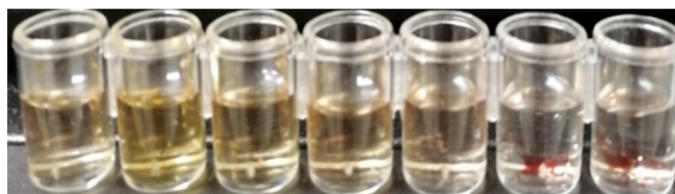

**Figure S1.** The picture of the DVDMS after reaction with different amounts of  $\text{Cu}^{2+}$  ( $[\text{Cu}^{2+}]/[\text{DVDMS}]$  ratios (0: 1, 0.5: 1, 1: 1, 2: 1, 5: 1, 10: 1 and 20: 1).

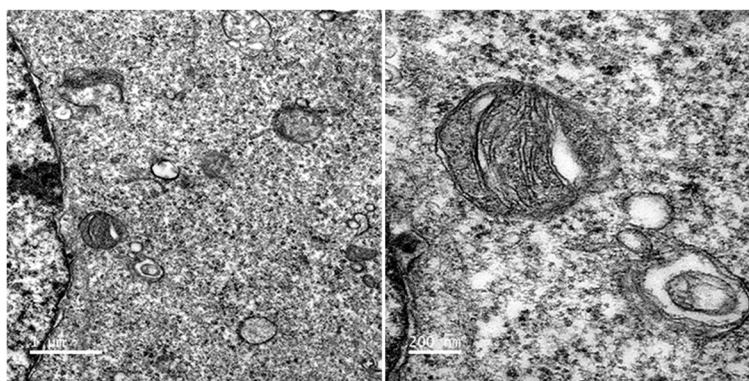

**Figure S2.** Cell TEM image of the cells incubated with DVDMS at 12 h.

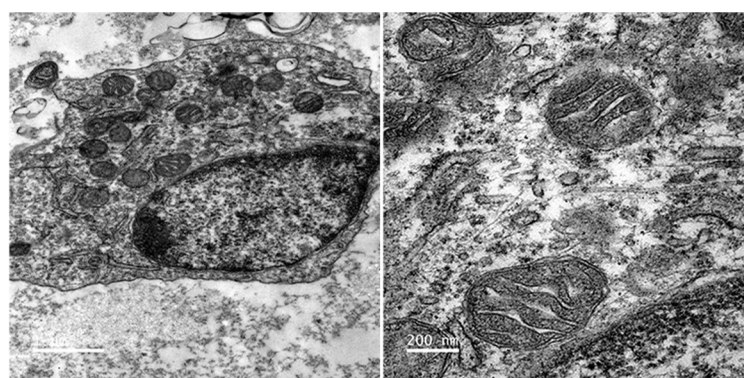

**Figure S3.** TEM images of 4T1 tumor thin sections at 12 h after injection of DVDMS.

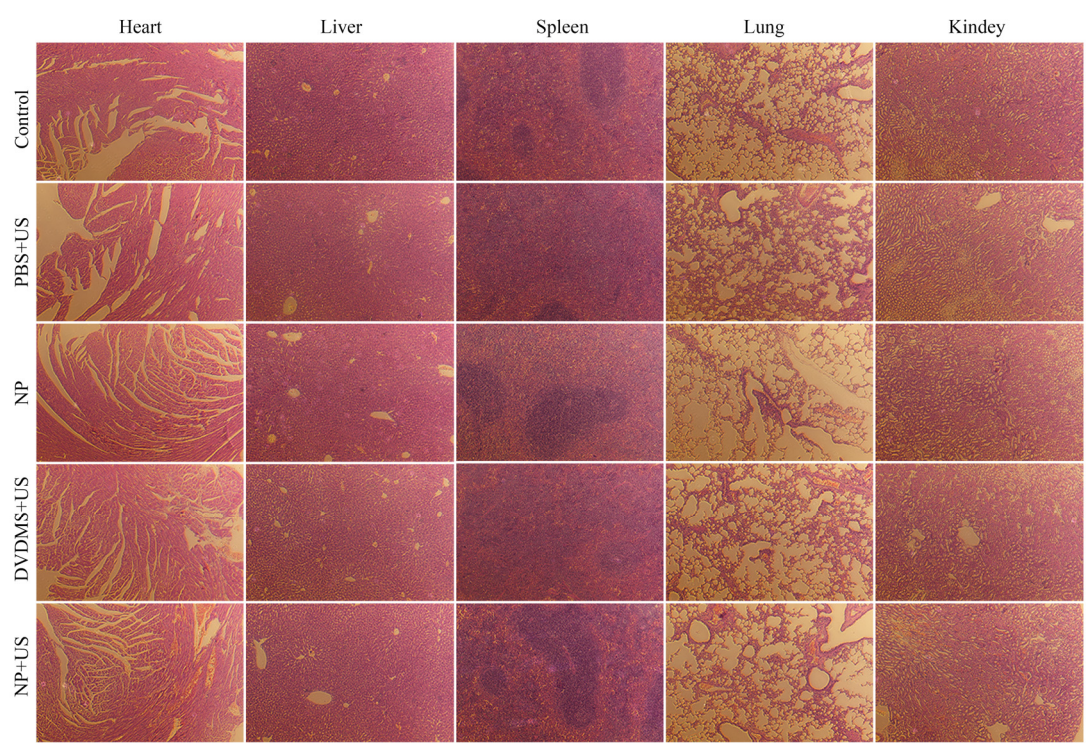

**Figure S4.** Histochemical study of the organs harvested from mice with different treatments at 12 h.

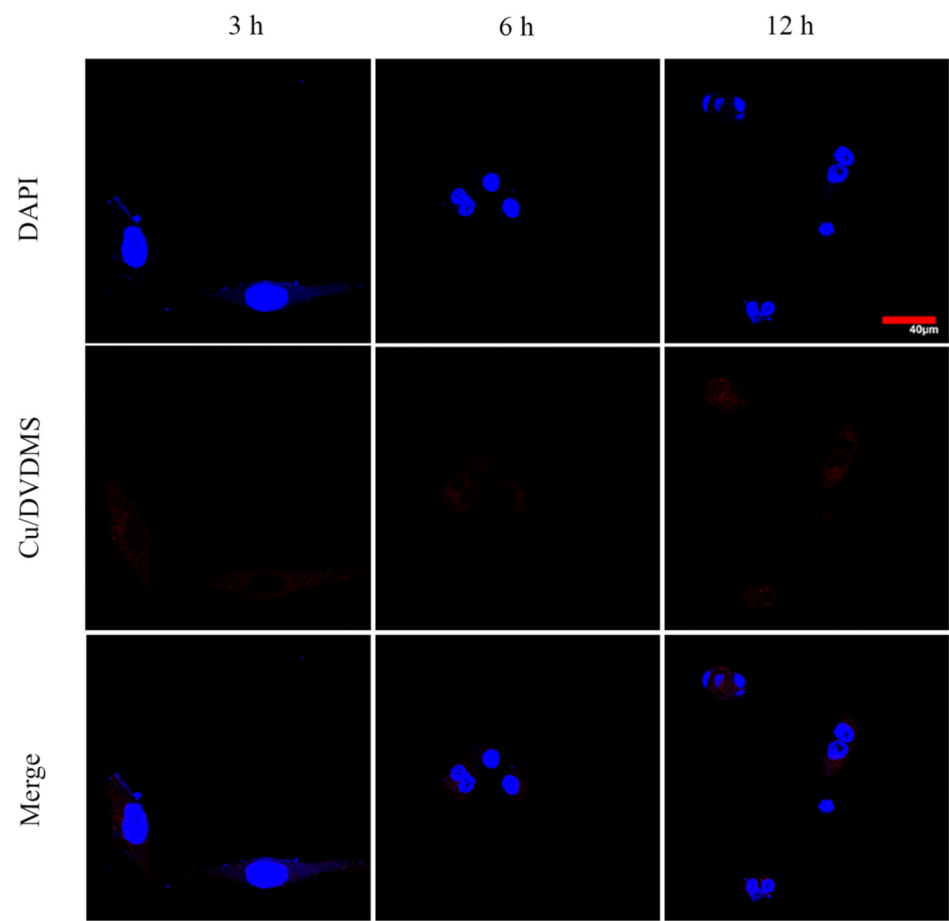

**Figure S5.** The CLSM images of 4T1 cells incubated with Cu/DVDMS (DVDMS concentration was 10  $\mu\text{g/mL}$ ) at 3, 6, 12 h. Scale bar = 40  $\mu\text{m}$ .

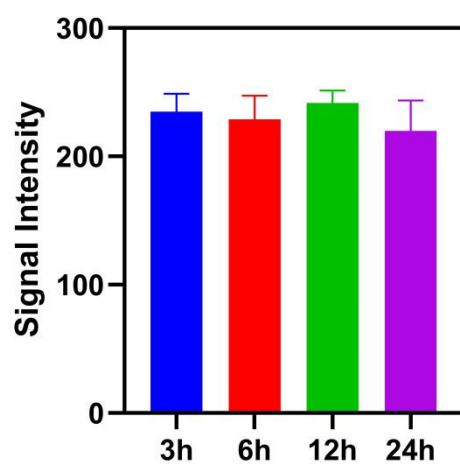

**Figure S6.** Quantitative analysis of PET signal in tumor section at 3, 6, 12, 24 h.
